# Supplementary material for: P2X7 receptor induces microglia polarization to the M1 phenotype in cancer-induced bone pain rat models
Source: PubMed Central journal article supplement — Mol Pain. 2022 Jan 20;18:17448069211060962. doi: 10.1177/17448069211060962 (PMC8961217; doi:10.1177/17448069211060962), 2022-01-20
Supplement: sj-pdf-1-mpx-10.1177_17448069211060962.pdf [file sj-pdf-1-mpx-10.1177_17448069211060962.pdf]

**Supplementary file 1 : P2X7R siRNA oligo sequences**

| Gene           | Sense (5'-3')          | Antisense (5'-3')     |
|----------------|------------------------|-----------------------|
| P2X7R-mus-196  | GCAGUAUGAGACAAACAAATT  | UUUGUUUGUCUCAUACUGCTT |
| P2X7R-mus-1083 | GGACGUUGAUCAAAGCCUUTT  | AAGGCUUUGAUCAACGUCCTT |
| P2X7R-mus-1426 | GCAAGUUGUCAAAAGGCCAATT | UUGGCCUUUGACAACUUGCTT |

**Supplementary Table 1 Primary Antibody Lists**

| Antibody                             | Company             | Catalogue Number | Application | Dilution |
|--------------------------------------|---------------------|------------------|-------------|----------|
| <b>anti-P2X7R</b>                    | Invitrogen          | PA5-77665        | IF          | 1:200    |
| <b>anti-Iba1</b>                     | Servicebio          | GB12105          | IF          | 1:200    |
| <b>anti-GFAP</b>                     | Servicebio          | GB12096          | IF          | 1:200    |
| <b>anti-NeuN</b>                     | Proteintech         | 66836-1-Ig       | IF          | 1:200    |
| <b>Cy3 conjugated</b>                |                     |                  |             |          |
| <b>Goat</b>                          | Servicebio          | GB21301          | IF          | 1:300    |
| <b>Anti-mouse IgG</b>                |                     |                  |             |          |
| <b>Alexa Fluor®</b>                  |                     |                  |             |          |
| <b>488-conjugated</b>                |                     |                  |             |          |
| <b>Goat</b>                          | Servicebio          | GB25303          | IF          | 1:400    |
| <b>Anti-Rabbit</b>                   |                     |                  |             |          |
| <b>IgG</b>                           |                     |                  |             |          |
| <b>anti-P2X7R</b>                    | Abcam               | ab109054         | WB          | 1:1000   |
| <b>anti-CD86</b>                     | ABclonal Technology | A1199            | WB          | 1:1000   |
| <b>anti-iNOS</b>                     | ABclonal Technology | A0312            | WB          | 1:1000   |
| <b>anti-CD163</b>                    | Abcam               | ab182422         | WB          | 1:1000   |
| <b>anti-Arg-1</b>                    | Abcam               | ab205587         | WB          | 1:1000   |
| <b>anti-TNF-<math>\alpha</math></b>  | Abcam               | ab205587         | WB          | 1:1000   |
| <b>anti-IL-18</b>                    | ABclonal Technology | A16737           | WB          | 1:1000   |
| <b>anti-IL-4</b>                     | Proteintech         | 66142-1-Ig       | WB          | 1:1000   |
| <b>anti-IL-10</b>                    | ABclonal Technology | A2171            | WB          | 1:1000   |
| <b>anti-<math>\beta</math>-actin</b> | Abcam               | ab115777         | WB          | 1:1000   |
| <b>HRP goat</b>                      |                     |                  |             |          |
| <b>anti-Rabbit IgG</b>               | ABclonal            | AS014            | WB          | 1:5000   |
| <b>HRP goat</b>                      |                     |                  |             |          |
| <b>anti-Mouse IgG</b>                | ABclonal            | AS003            | WB          | 1:5000   |

**Supplementary Table 2 Primer sequences used for real-time polymerase chain reaction analysis**

| Gene                           | Forward 5'-3'             | Reverse 5'-3'            |
|--------------------------------|---------------------------|--------------------------|
| <i>IL-18</i>                   | GACCAAGTTCTCTTCGTTGACAAAA | CTATCCTTCACAGAGAGGGTCACA |
| <i>TNF-<math>\alpha</math></i> | ACAAGGCTGCCCCGACTAC       | TGGGCTCATACCAGGGTTTG     |
| <i>IL-4</i>                    | TATCCACGGATGCGACAAAA      | GCCCTACAGACGAGCTCACTCT   |
| <i>IL-10</i>                   | CAGAGAAGCATGGCCAGAA       | CACCTTGGTCTTGGAGCTTATAAA |
| <i>GAPDH</i>                   | CCAAGGTCATCCATGACAAC      | TCCACAGTCTTCTGAGTGGC     |
